# Supplementary material
Source: publisher site journal article supplement (https://arthropod-systematics.arphahub.com/article/75819/download/suppl/33/)
Supplement: Supplementary file 1

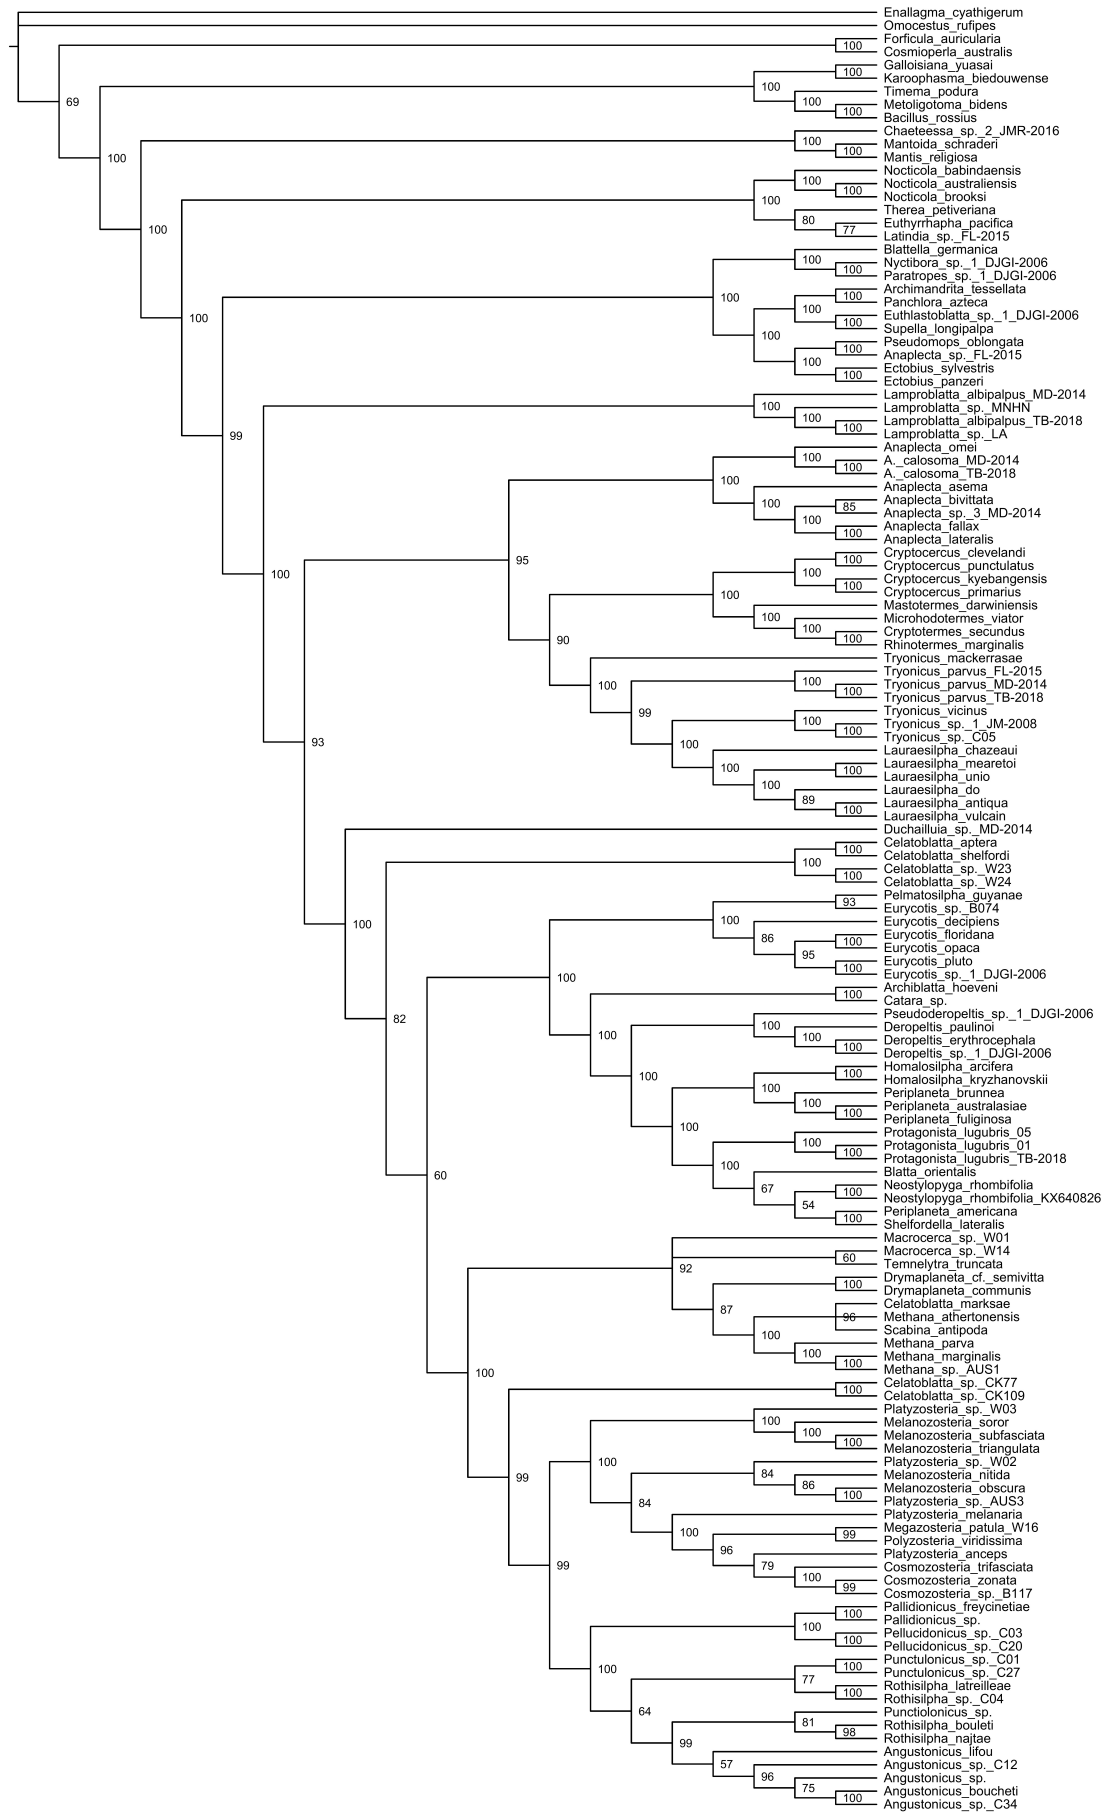

0.3

**Figure S1.** T-BI-4 tree. Tree from Bayesian Inference analysis of the trimmed data set using 4 partitions. Genus names and assignments do not reflect the taxonomic changes made in the present paper. The numbers are posterior probabilities.

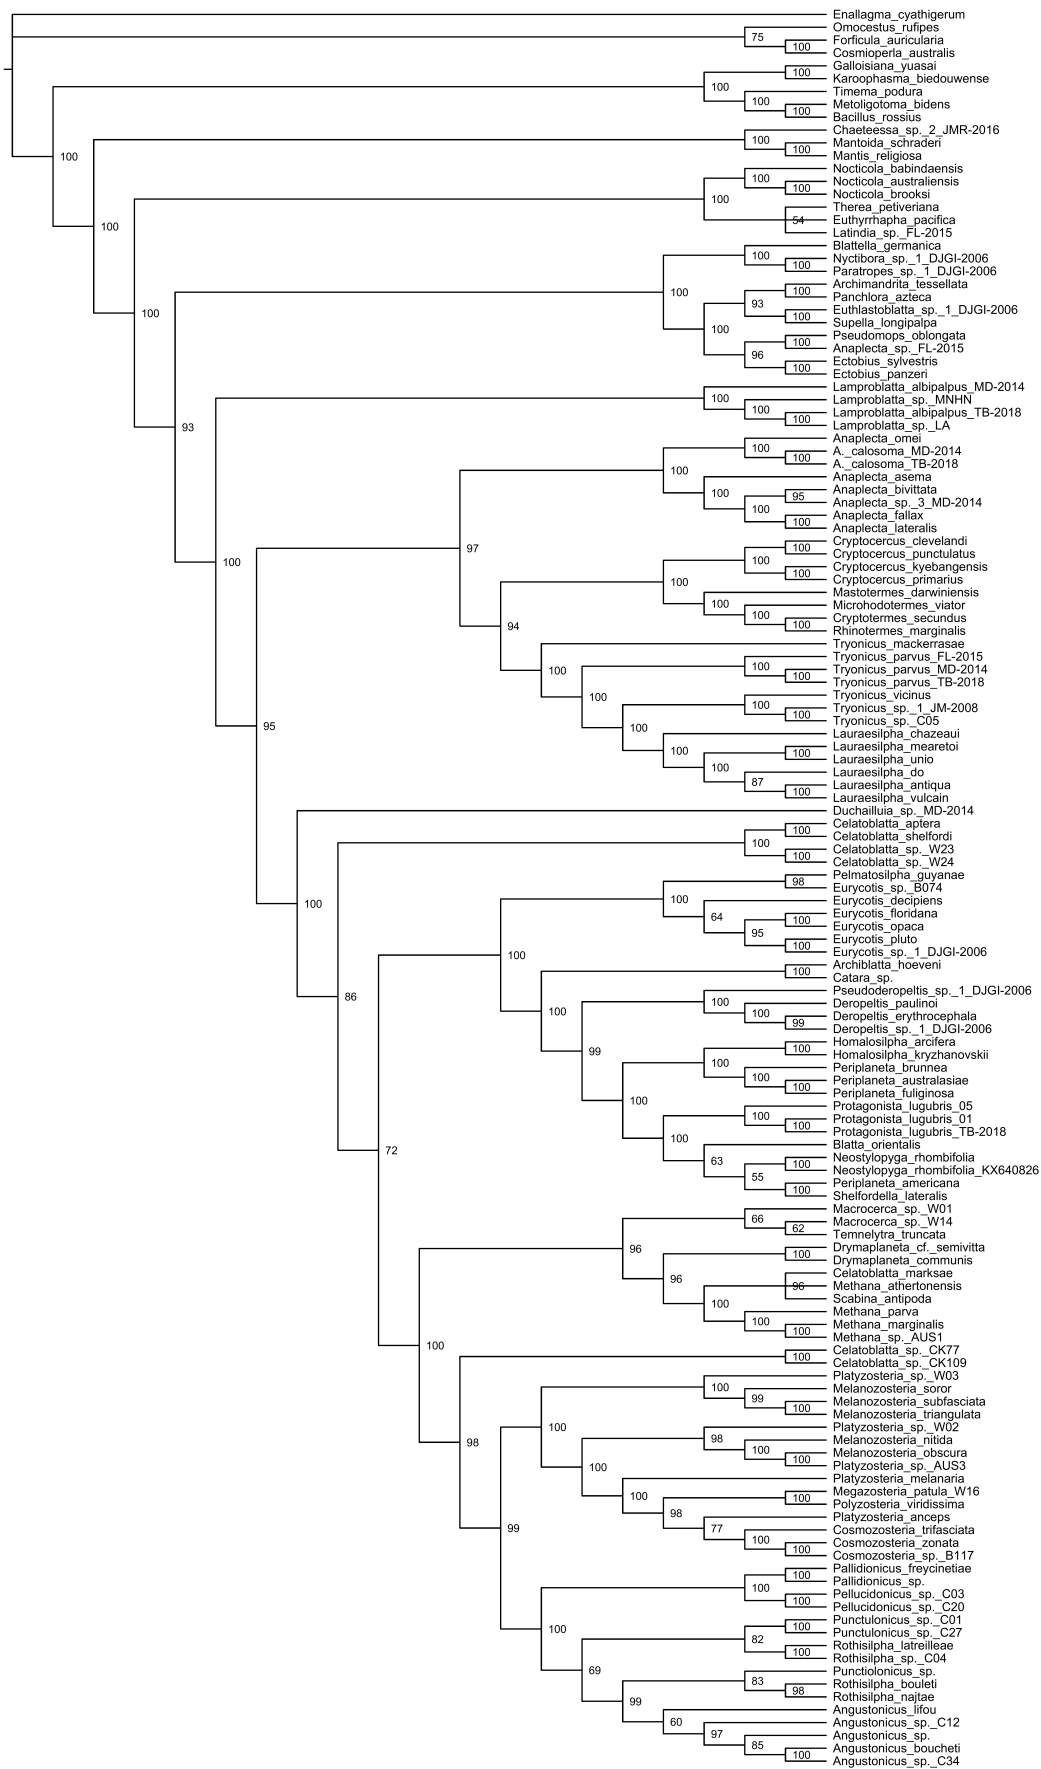

0.3

**Figure S2.** T-BI-6 tree. Tree from Bayesian Inference analysis of the trimmed data set using 6 partitions. Genus names and assignments do not reflect the taxonomic changes made in the present paper. The numbers are posterior probabilities.



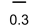

**Figure S3.** T-BI-10 tree. Tree from Bayesian Inference analysis of the trimmed data set using 10 partitions. Genus names and assignments do not reflect the taxonomic changes made in the present paper. The numbers are posterior probabilities.

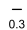

**Figure S4.** C-BI-4 tree. Tree from Bayesian Inference analysis of the complete data set using 4 partitions. Genus names and assignments do not reflect the taxonomic changes made in the present paper. The numbers are posterior probabilities.

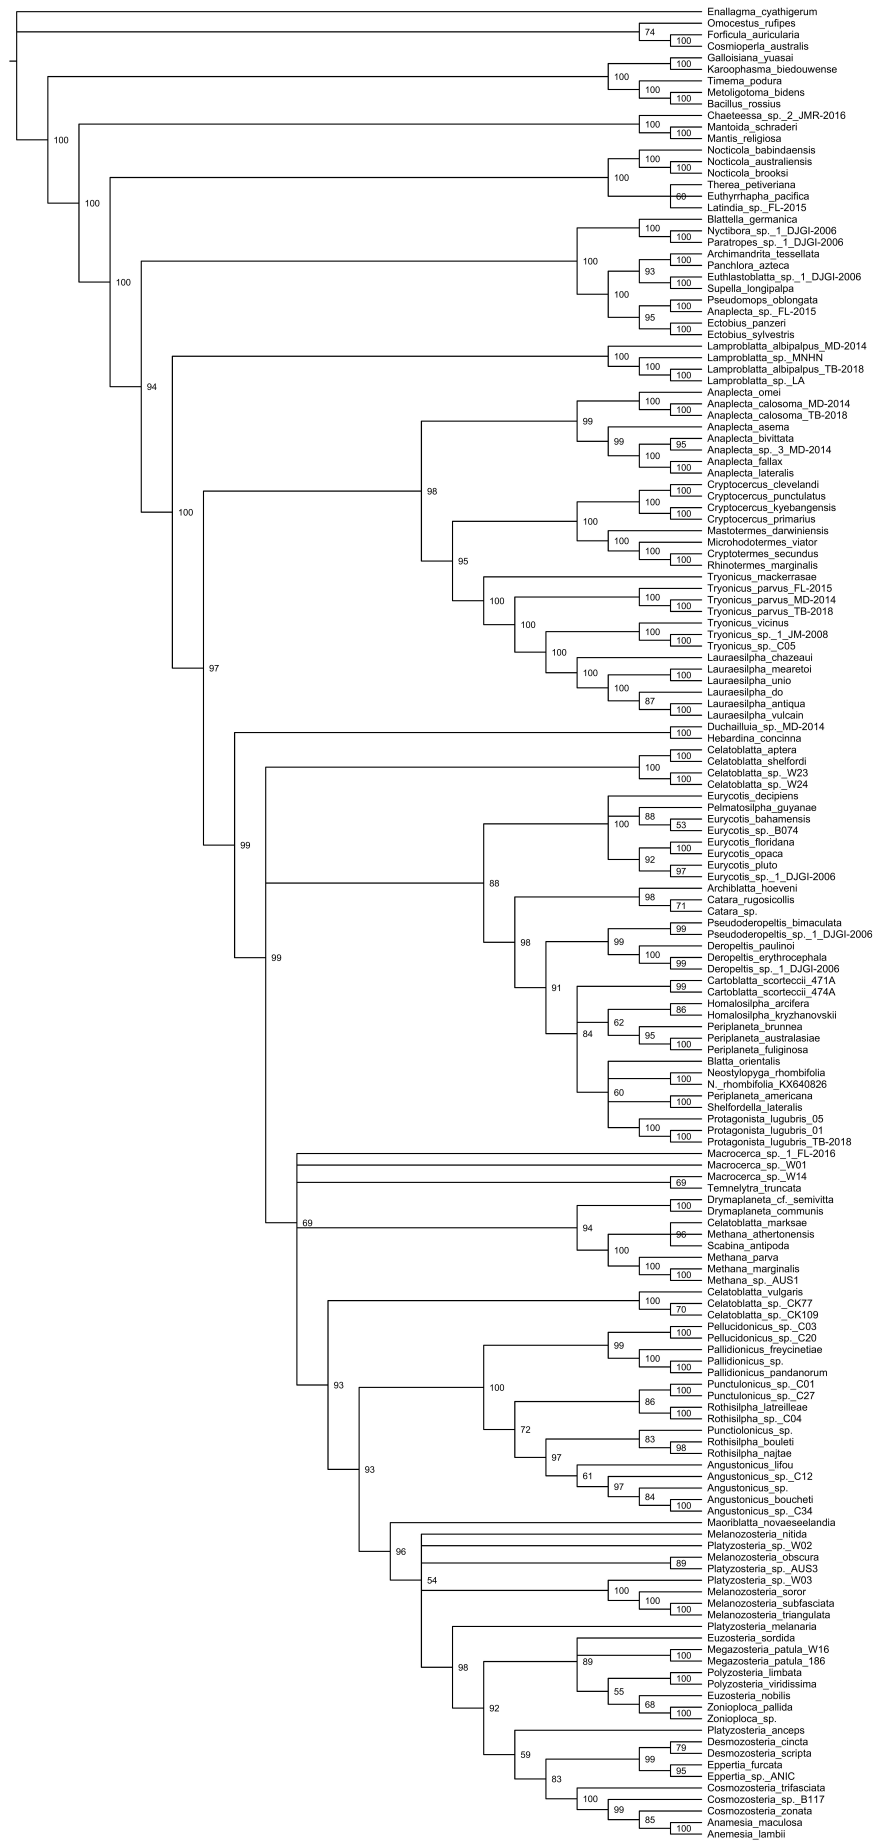

**Figure S5.** C-BI-6 tree. Tree from Bayesian Inference analysis of the complete data set using 6 partitions. Genus names and assignments do not reflect the taxonomic changes made in the present paper. The numbers are posterior probabilities.



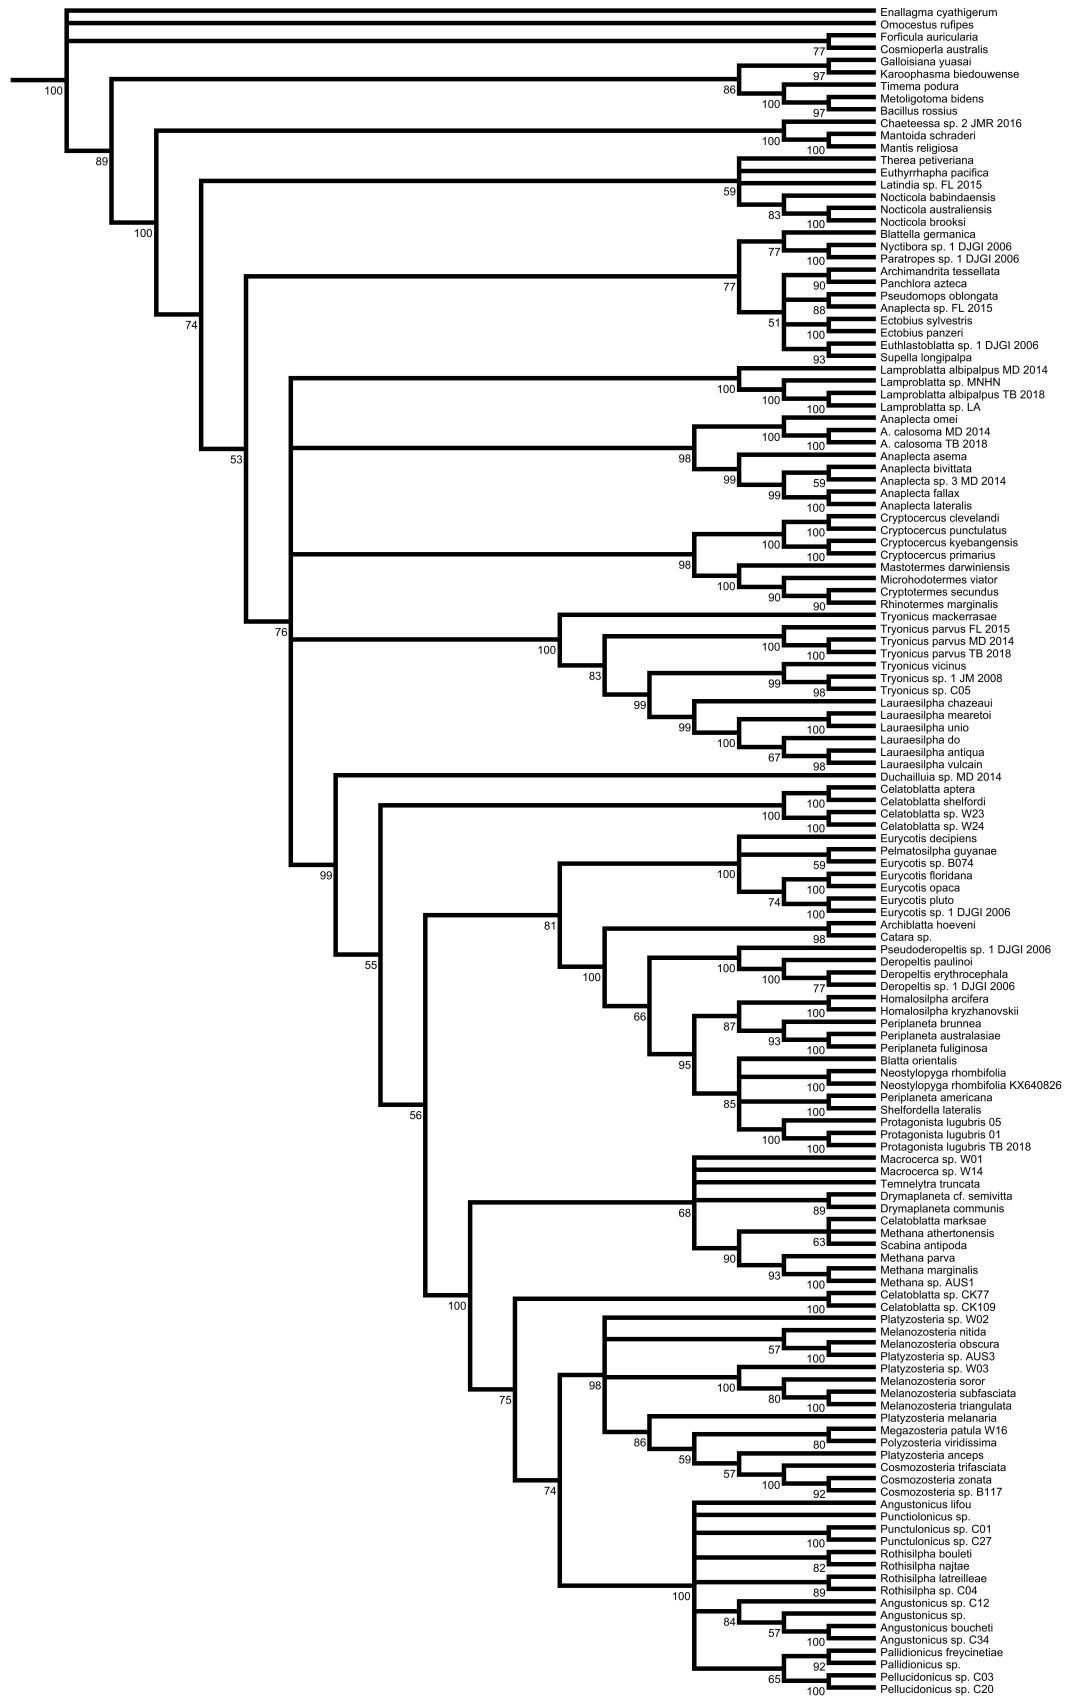

**Figure S7.** T-ML-4 bootstrap tree. Bootstrap tree from Maximum likelihood analysis of the trimmed data set using 4 partitions. Genus names and assignments do not reflect the taxonomic changes made in the present paper. The numbers are bootstrap values.

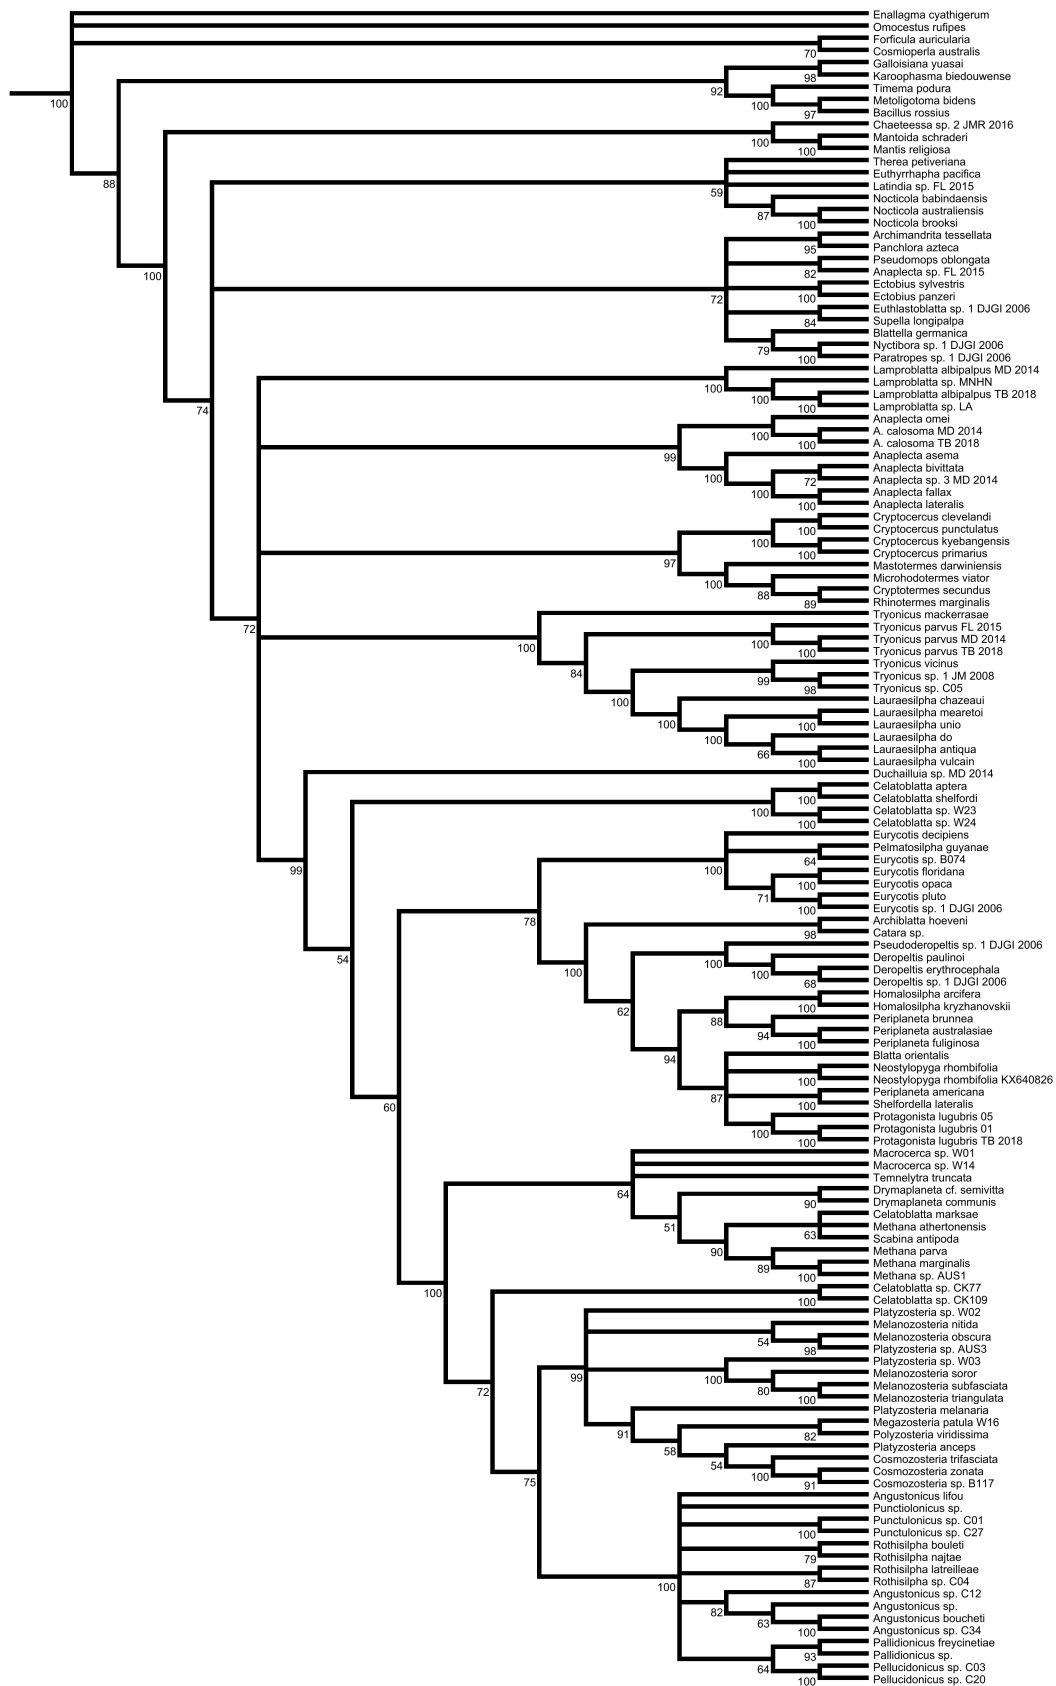

**Figure S8.** T-ML-6 bootstrap tree. Bootstrap tree from Maximum likelihood analysis of the trimmed data set using 6 partitions. Genus names and assignments do not reflect the taxonomic changes made in the present paper. The numbers are bootstrap values.

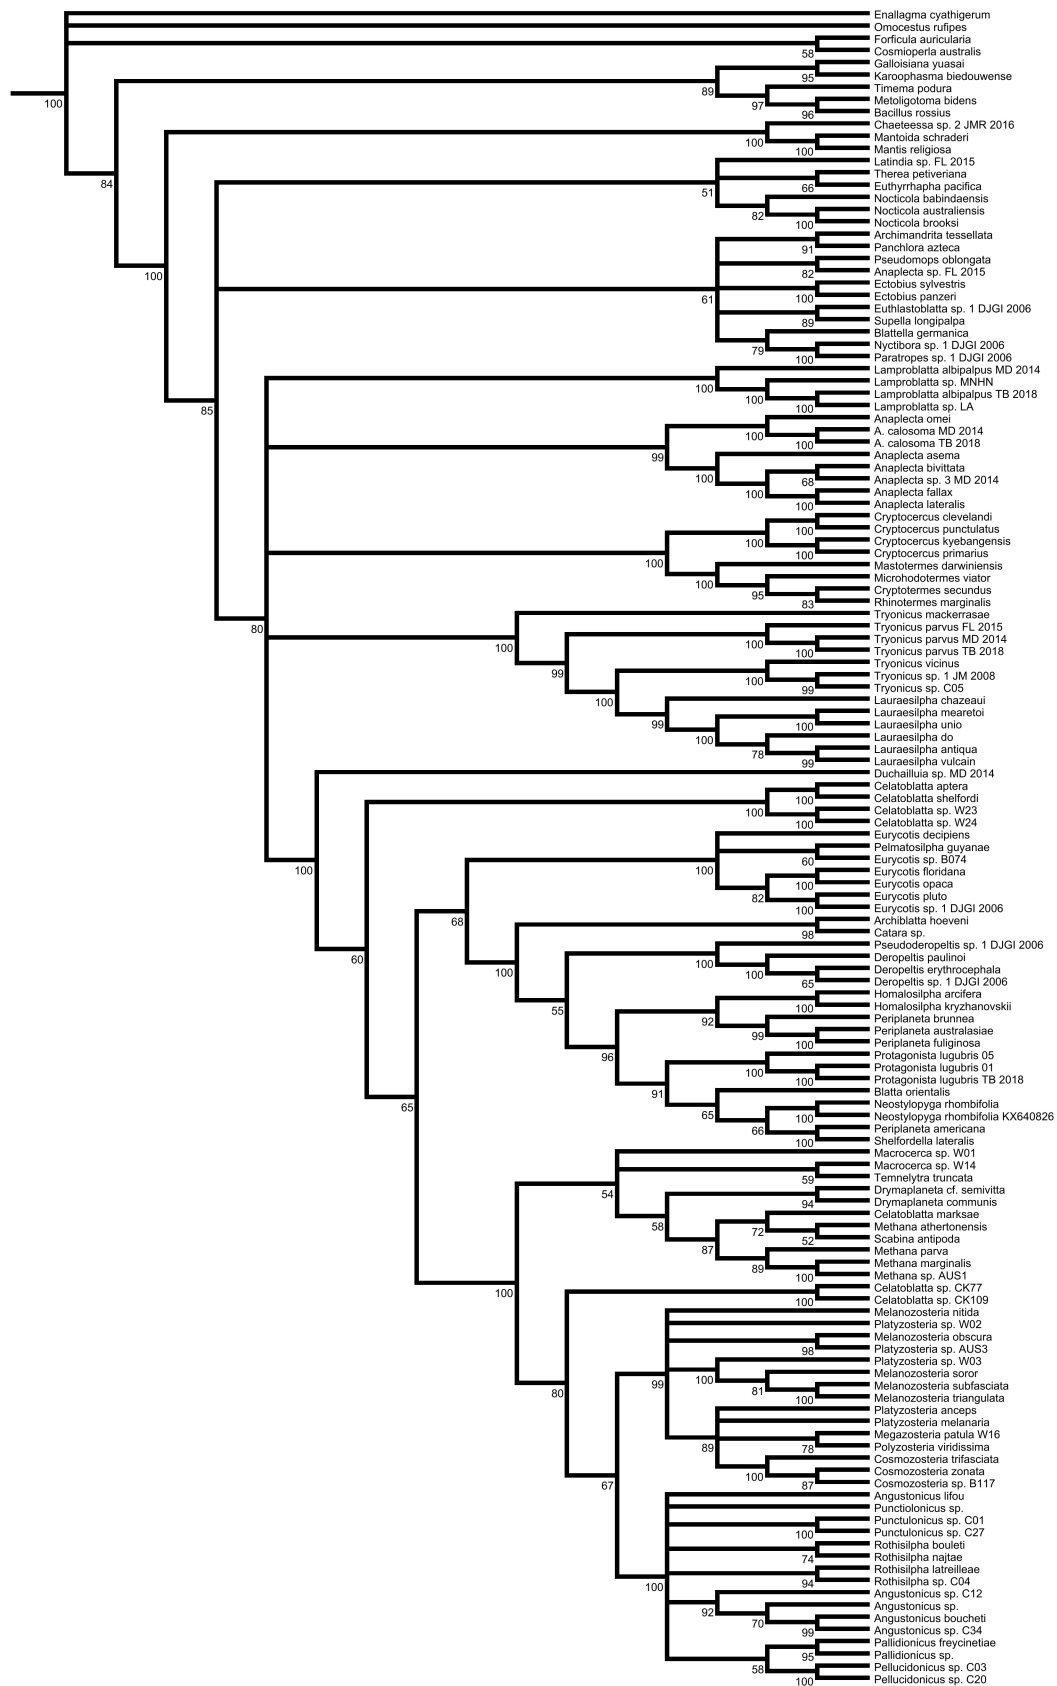

**Figure S9.** T-ML-10 bootstrap tree. Bootstrap tree Maximum likelihood analysis of the trimmed data set using 10 partitions. Genus names and assignments do not reflect the taxonomic changes made in the present paper. The numbers are bootstrap values.

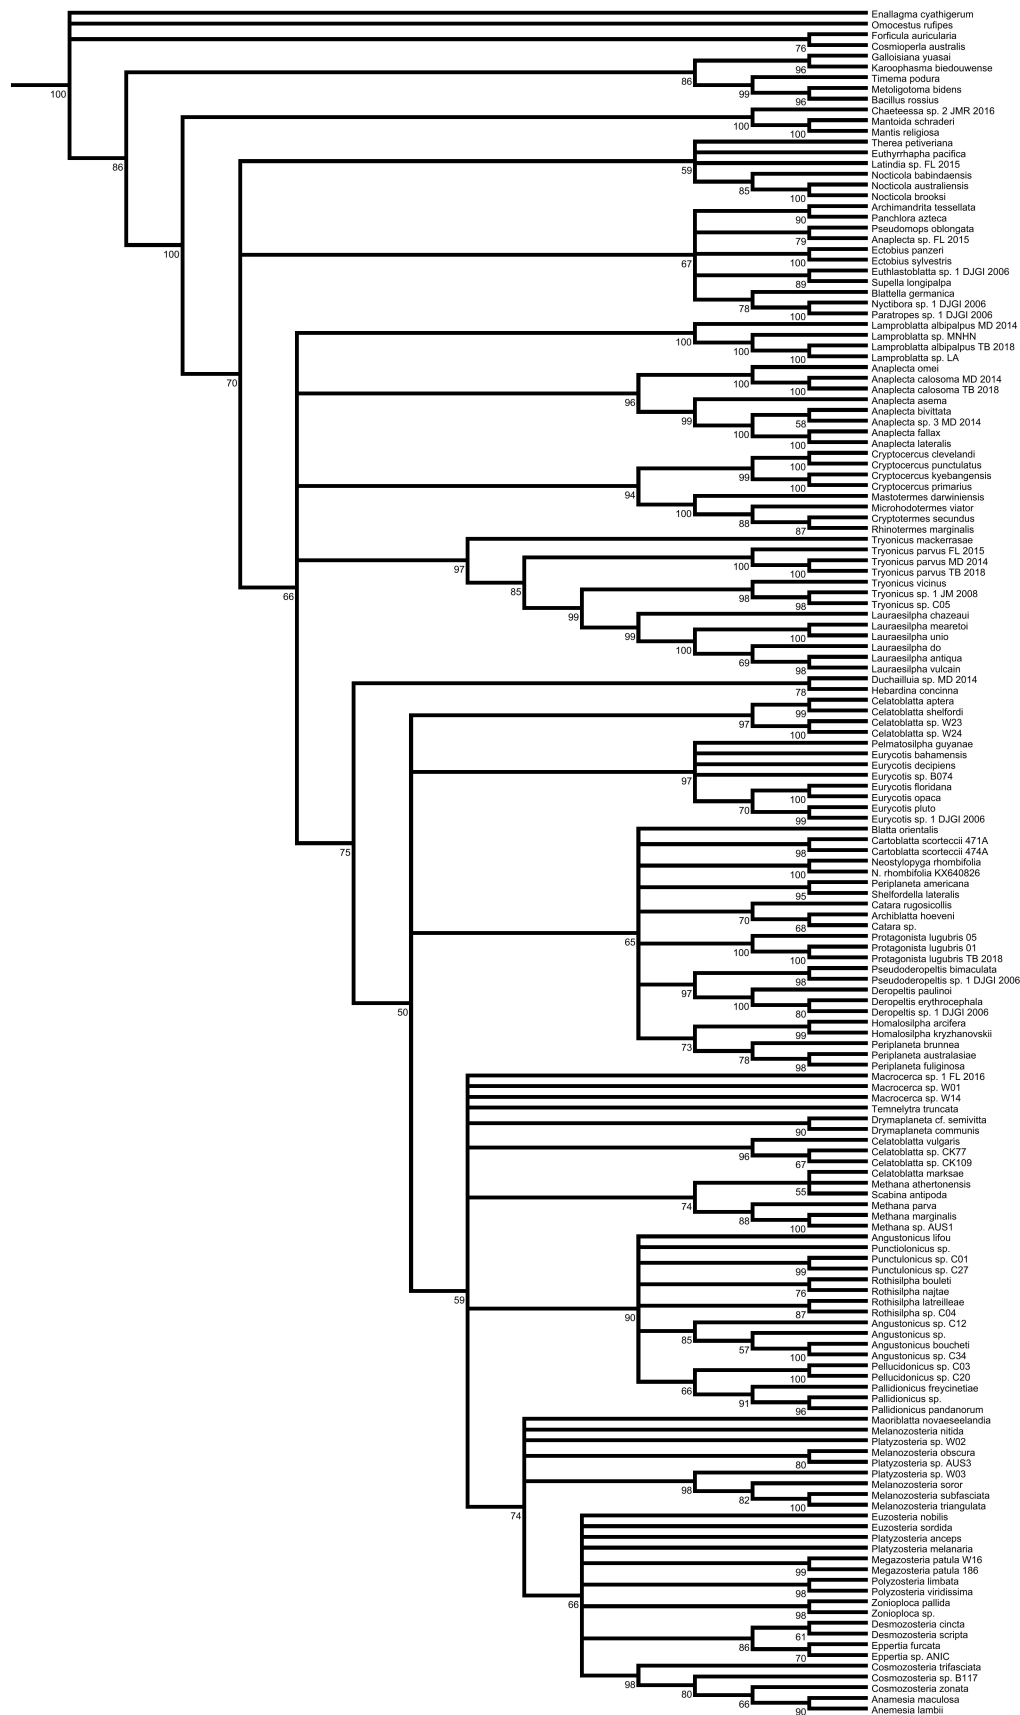

**Figure S10.** C-ML-4 bootstrap tree. Bootstrap tree from Maximum likelihood analysis of the complete data set using 4 partitions. Genus names and assignments do not reflect the taxonomic changes made in the present paper. The numbers are bootstrap values.



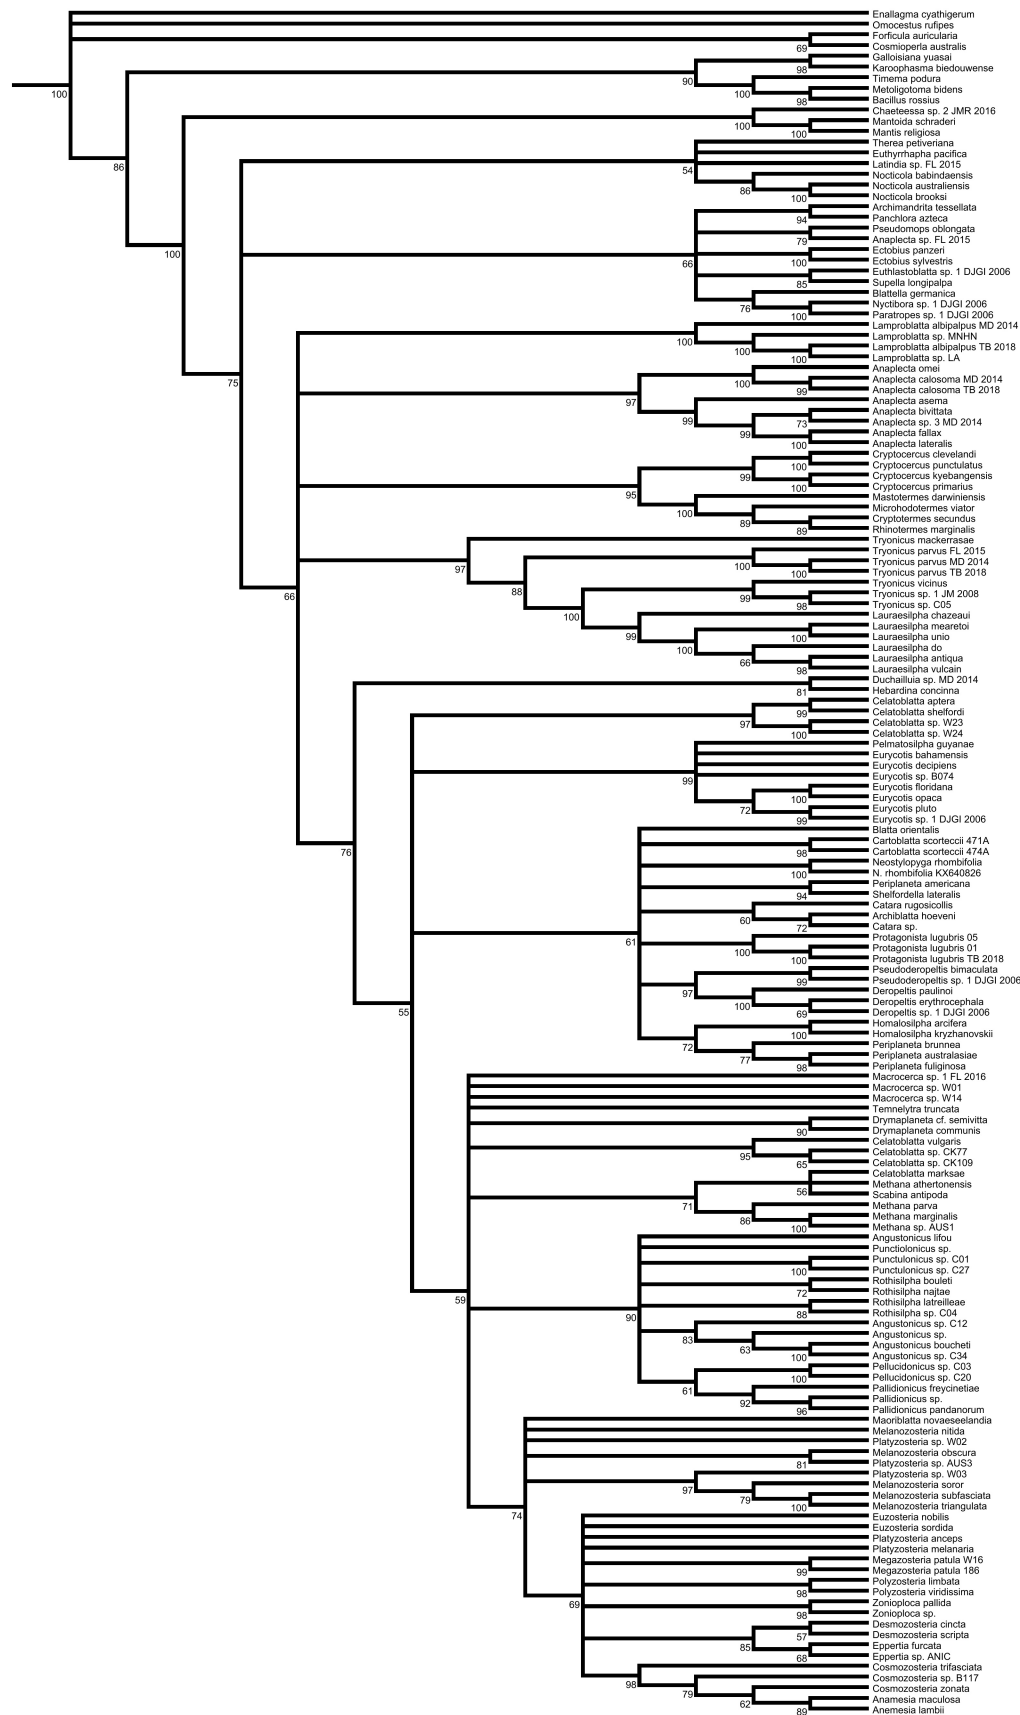

**Figure S11.** C-ML-6 bootstrap tree. Bootstrap tree from Maximum likelihood analysis of the complete data set using 6 partitions. Genus names and assignments do not reflect the taxonomic changes made in the present paper. The numbers are bootstrap values.

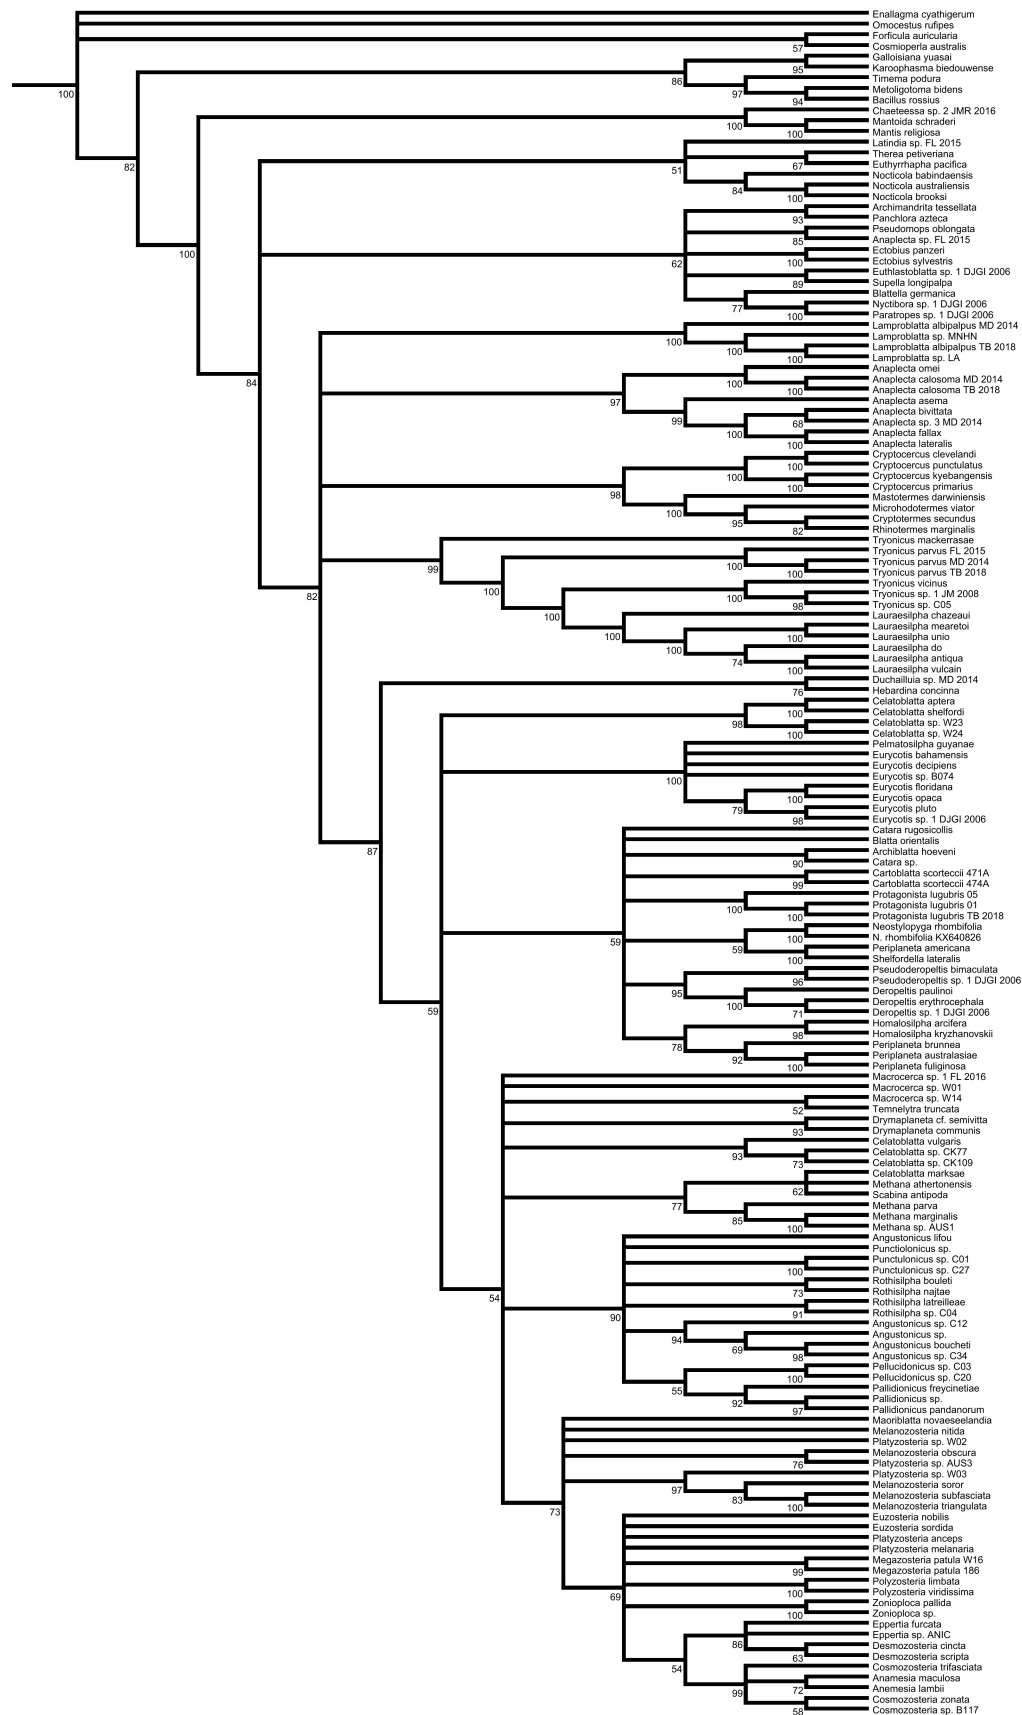

**Figure S12.** C-ML-10 bootstrap tree. Bootstrap tree from Maximum likelihood analysis of the complete data set using 10 partitions. Genus names and assignments do not reflect the taxonomic changes made in the present paper. The numbers are bootstrap values.
